# Supplementary material
Source: publisher figshare collection journal article supplement (https://sage.figshare.com/ndownloader/files/13765256)
Supplement: Supplementary file 1 [file 13765256]

### Box 1 Sample of FGD questions

1. Please can you tell us a little bit about yourself?
2. In your opinion, what are some of the factors that make patients who are diagnosed with breast cancer delay in receiving treatment?  
*(Probes: socioeconomic status; use of Complementary and Alternative Medicine; patient perception; fear of doctors; fear of coming to Korle Bu; travel time/distance to Korle Bu)*
3. How do health providers contribute to the delay in the onset of breast cancer treatment?  
*(Probes: workload; number of patients and documentation; attitude of staff; expertise; logistics)*
4. How does the healthcare system in Korle Bu contribute to the delay in breast cancer treatment?  
*(Probes: availability of adequate numbers of healthcare workers; availability of facilities and drugs; time for laboratory investigations and waiting lists)*
5. In your opinion, how can we reduce the waiting time between breast cancer diagnosis and start of definitive treatment at the Korle Bu Teaching Hospital?
